# Supplementary material
Source: PubMed Central journal article supplement (PMC4129448)
Supplement: NIHMS606226-supplement-supp_2.pdf [file NIHMS606226-supplement-supp_2.pdf]

**Supplementary Table S1: DNA sample source, sequencing method and mutation summary**

| PitB CASE | Germ-line DNA Sample Source                   | Germ-line DNA Sequencing Method                   | Germ-line <i>DICER1</i> Mutation | Tumour DNA Sample Source   | Tumour DNA Sequencing Method                                       | Somatic <i>DICER1</i> Mutation |
|-----------|-----------------------------------------------|---------------------------------------------------|----------------------------------|----------------------------|--------------------------------------------------------------------|--------------------------------|
| CASE 1    | Not Available                                 | N/A                                               | N/A                              | FFPE tissue                | PCR Sequencing of RNase IIIa & IIIb domains                        | c.5437G>A <sup>a</sup>         |
| CASE 2    | DNA extracted from blood lymphocytes          | <i>DICER1</i> Full gene PCR Sequencing            | c.3277_3280delAACT               | FFPE tissue                | PCR Sequencing of RNase IIIa & IIIb domains                        | Negative                       |
| CASE 3    | DNA extracted from blood lymphocytes          | <i>DICER1</i> Full gene PCR Sequencing            | c.2379T>G                        | Not Available              | N/A                                                                | N/A                            |
| CASE 4    | DNA extracted from saliva                     | <i>DICER1</i> Full gene PCR Sequencing            | c.3535_3538delTCTT               | FFPE tissue                | PCR Sequencing of RNase IIIa & IIIb domains                        | c.5125G>T                      |
| CASE 5    | DNA extracted from 3-5mL EDTA-preserved blood | <i>DICER1</i> Full gene PCR Sequencing            | c.1525C>T                        | FFPE tissue                | PCR Sequencing of RNase IIIa & IIIb domains                        | c.5425G>T                      |
| CASE 6    | FFPE tissue                                   | Fluidigm Access Array; Next-generation Sequencing | c.4309_4312delGACT               | FFPE tissue                | PCR Sequencing of RNase IIIa & IIIb domains                        | c.5125G>A                      |
| CASE 7    | Not Available                                 | N/A                                               | N/A                              | Not Available              | N/A                                                                | N/A                            |
| CASE 8    | FFPE tissue                                   | <i>DICER1</i> Full gene PCR Sequencing            | Poor quality DNA                 | FFPE tissue                | PCR Sequencing of RNase IIIa & IIIb domains                        | Poor quality DNA               |
| CASE 9    | DNA extracted from saliva                     | <i>DICER1</i> Full gene PCR Sequencing            | c.2026C>T                        | FFPE tissue & fresh frozen | PCR Sequencing of RNase IIIa & IIIb domains                        | c.5439G>T                      |
| CASE 10   | FFPE tissue                                   | Fluidigm Access Array; Next-generation Sequencing | c.2026C>T                        | FFPE tissue                | PCR Sequencing of RNase IIIa & IIIb domains                        | c.5438A>T                      |
| CASE 11   | DNA extracted from blood lymphocytes          | Fluidigm Access Array; Next-generation Sequencing | c.1284delGA                      | FFPE tissue                | PCR Sequencing of RNase IIIa & IIIb domains                        | c.5437G>A                      |
| CASE 12   | DNA extracted from blood lymphocytes          | <i>DICER1</i> Full gene PCR Sequencing            | c.5125G>C                        | FFPE tissue & fresh frozen | PCR Sequencing of RNase IIIa & IIIb domains                        | LOH                            |
| CASE 13   | DNA extracted from blood lymphocytes          | Fluidigm Access Array & MLPA                      | Negative                         | Extracted tumour DNA       | PCR Sequencing of RNase IIIa & IIIb domains; STR marker genotyping | LOH                            |

**In summary:** germ-line and somatic samples were acquired from ten cases; tumour only from one case; germ-line only from one case; and no tumour or germ-line sample from one case. **Abbreviations:** FFPE, formalin-fixed paraffin-embedded; LOH, loss of heterozygosity; NMD, nonsense-mediated decay; MLPA, Multiplex Ligation-based Probe Amplification assay; STR, short tandem repeat.

<sup>a</sup> Mutation not confirmed to be somatic in origin.
