# Supplementary material
Source: PubMed Central journal article supplement (PMC4129448)
Supplement: NIHMS606226-supplement-supp_3.pdf [file NIHMS606226-supplement-supp_3.pdf]

Supplementary Table S2: Fluidigm Access Array Custom Design Primers

| Forward Primer          | Primer Sequence                                   | Reverse Primer          | Primer Sequence                                  |
|-------------------------|---------------------------------------------------|-------------------------|--------------------------------------------------|
| DICER1fE01-CS1F         | ACACTGACGACATGGTTCTACATGCAATGAAAGAACTGG           | DICER1fE01-CS2R         | TACGGTAGCAGAGACTTGGTCTccagctattagtgtccagtag      |
| DICER1fE02a-CS2F        | TACGGTAGCAGAGACTTGGTCTATTGGAGGACGATTTTAGAGAA      | DICER1fE02a-CS1R        | ACACTGACGACATGGTTCTACACTTCCCTGAGCCAGTGTTTA       |
| DICER1fE02b-CS1F        | ACACTGACGACATGGTTCTACAGCTTGAAGCAGCTTGGAT          | DICER1fE02b-CS2R        | TACGGTAGCAGAGACTTGGTCTTcccctgcacaactgata         |
| DICER1fE03a-CS2F        | TACGGTAGCAGAGACTTGGTCTCAGAGAGCAACTAGCAAG          | DICER1fE03a-CS1R        | ACACTGACGACATGGTTCTACAGGTTCCATCTCTCTTTGTCC       |
| DICER1fE03b-CS1F        | ACACTGACGACATGGTTCTACAAACAAGTGTACAGTGTGAGAAC      | DICER1fE03b-CS2R        | TACGGTAGCAGAGACTTGGTCTaccaagtcagaactgtagg        |
| DICER1fE04a-CS2F        | TACGGTAGCAGAGACTTGGTCTAGGCAGTGAATGTCTATGTTG       | DICER1fE04a-CS1R        | ACACTGACGACATGGTTCTACATGGTCTAGGATTGCAAGATGA      |
| DICER1fE04b-CS1F        | ACACTGACGACATGGTTCTACTTGTCTATGTCGCCTTGAAT         | DICER1fE04b-CS2R        | TACGGTAGCAGAGACTTGGTCTaaaacaaaatgctcattactca     |
| DICER1fE05a-rd-CS1F     | ACACTGACGACATGGTTCTACAATGGCGATCTCTCTGTGTT         | DICER1fE05b-CS2R        | TACGGTAGCAGAGACTTGGTCTagctgagcaactgaaagtc        |
| DICER1fE06a-CS2F        | TACGGTAGCAGAGACTTGGTCTTTAAATGCACTTCTACTACTGC      | DICER1fE06a-CS1R        | ACACTGACGACATGGTTCTACACAATCATGATAAAAATTAAGTGCTTC |
| DICER1fE06b-CS1F        | ACACTGACGACATGGTTCTACAAAGTGGGCTTATGAAAGACTG       | DICER1fE06b-CS2R        | TACGGTAGCAGAGACTTGGTCTgcaatgacatatttcaatcca      |
| DICER1fE07a-CS2F        | TACGGTAGCAGAGACTTGGTCTGTACATTATTATTGGCATTAGG      | DICER1fE07a-CS1R        | ACACTGACGACATGGTTCTACAAAATAAAAATTTCTGTGACGCTC    |
| DICER1fE07b-CS2F        | TACGGTAGCAGAGACTTGGTCTTGGTAAGAGAACTACAGAAATACATCA | DICER1fE07b-CS1R        | ACACTGACGACATGGTTCTACAGTTTATATTGGCGTAAGATTTCGAG  |
| DICER1fE07c-CS2F        | TACGGTAGCAGAGACTTGGTCTCACTTGACCTGAAATTTGTAAGT     | DICER1fE07c-CS1R        | ACACTGACGACATGGTTCTACAATTTGTCTCTGGCTTCTCTTTT     |
| DICER1fE07d-rd-CS2F     | TACGGTAGCAGAGACTTGGTCTAAGCGTGTAGTGGTATAATAATAGAAA | DICER1fE07d-CS1R        | ACACTGACGACATGGTTCTACATGTGAAAGGAGTCAACTACAGATT   |
| DICER1fE08-CS1F         | ACACTGACGACATGGTTCTACAaagtttaactccaatgtgataa      | DICER1fE08-CS2R         | TACGGTAGCAGAGACTTGGTCTtggctgtatgtcccgaagaa       |
| DICER1fE09a-CS2F        | TACGGTAGCAGAGACTTGGTCTAAATTTCTTAGAAGTGGTTTCTTG    | DICER1fE09a-CS1R        | ACACTGACGACATGGTTCTACATGCTTCTCTCTTTAGATTGAACAT   |
| DICER1fE09b-CS1F        | ACACTGACGACATGGTTCTACATTGGTGGTTCGTTTTGATTT        | DICER1fE09b-CS2R        | TACGGTAGCAGAGACTTGGTCTtgcggcaactgataat           |
| DICER1fE10a-CS2F        | TACGGTAGCAGAGACTTGGTCTGTGTTTTCATCATAAGTTCTGTTTT   | DICER1fE10a-CS1R        | ACACTGACGACATGGTTCTACATGTTGATTGTGACTCGTGA        |
| DICER1fE10b-CS1F        | ACACTGACGACATGGTTCTACAAAGTGTCCAAAGTCGGTGA         | DICER1fE10b-CS2R        | TACGGTAGCAGAGACTTGGTCTaacatcccagggttccac         |
| DICER1fE11a-CS1F        | ACACTGACGACATGGTTCTACAagctcagaattctttttctt        | DICER1fE11a-CS2R        | TACGGTAGCAGAGACTTGGTCTtctcttaaaactaacAACAATGGAG  |
| DICER1fE11b-CS1F        | ACACTGACGACATGGTTCTACATTATCAACTCTTATCTGCAATTA     | DICER1fE11b-CS2R        | TACGGTAGCAGAGACTTGGTCTgctcctgctcaatgctg          |
| DICER1fE12-CS2F         | TACGGTAGCAGAGACTTGGTCTAGAGGTAATACAGCATGTGC        | DICER1fE12-CS1R         | ACACTGACGACATGGTTCTACAGGTTGCAATTTATTTTCATTCCG    |
| DICER1fE13-CS2F         | TACGGTAGCAGAGACTTGGTCTCTGGATTGTGTAATCTCTCTTT      | DICER1fE13-CS1R         | ACACTGACGACATGGTTCTACACTAGGTTTACTCTGTCTTAACCAAT  |
| DICER1fE14a-CS2F        | TACGGTAGCAGAGACTTGGTCTGGAAGAGGCTAATATGCTTG        | DICER1fE14a-CS1R        | ACACTGACGACATGGTTCTACAGCCTTCTAAAGTTGAGTTCAT      |
| DICER1fE14b-CS1F        | ACACTGACGACATGGTTCTACATGATCAGCCCTGTTACCTGT        | DICER1fE14b-CS2R        | TACGGTAGCAGAGACTTGGTCTtctaagaacagactgtttga       |
| DICER1fE15a-CS2F        | TACGGTAGCAGAGACTTGGTCTGGGGTCTTTACATTTCTCT         | DICER1fE15a-CS1R        | ACACTGACGACATGGTTCTACATAGTGCAGGTTTTTCAAGC        |
| DICER1fE15b-CS1F        | ACACTGACGACATGGTTCTACATGTTGTCTCTACAAATGCTTGAGT    | DICER1fE15b-CS2R        | TACGGTAGCAGAGACTTGGTCTcaaaagctatgtttgatagtgic    |
| DICER1fE16-CS2F         | TACGGTAGCAGAGACTTGGTCTTGATCATGTTTTAAACAAGCTAAAGAG | DICER1fE16-CS1R         | ACACTGACGACATGGTTCTACACTTTCTCTTCCATTTAAATACC     |
| DICER1fE17a-CS2F        | TACGGTAGCAGAGACTTGGTCTTTAAATCAAAAAGCAACTGATTG     | DICER1fE17a-CS1R        | ACACTGACGACATGGTTCTACAGTGGTGTGAGATTGGTTAGG       |
| DICER1fE17b-CS1F        | ACACTGACGACATGGTTCTACAGCTGATGTGACTGATCTTACC       | DICER1fE17b-CS2R        | TACGGTAGCAGAGACTTGGTCTcaagtgcaatccaagtgta        |
| DICER1fE18-CS1F         | ACACTGACGACATGGTTCTACAttgataaaattgtttgaaattct     | DICER1fE18-CS2R         | TACGGTAGCAGAGACTTGGTCTcgaatcagctatttaactgg       |
| DICER1fE19a-CS2F        | TACGGTAGCAGAGACTTGGTCTTTGTATTTATCTGTCCATTTTCC     | DICER1fE19a-CS1R        | ACACTGACGACATGGTTCTACAAAAGGAGTGAAGGCGATA         |
| DICER1fE19b-CS1F        | ACACTGACGACATGGTTCTACAACATCCAATCCAGCATGAC         | DICER1fE19b-CS2R        | TACGGTAGCAGAGACTTGGTCTttctggctgactgca            |
| DICER1fE20a-CS2F        | TACGGTAGCAGAGACTTGGTCTGTGTTTTGAAGAACTCATGATA      | DICER1fE20a-CS1R        | ACACTGACGACATGGTTCTACACTTATAGCACCTGATGTGCGAG     |
| DICER1fE20b-CS1F        | ACACTGACGACATGGTTCTACAGATAATTACTGTAAGCACAGCACAA   | DICER1fE20b-CS2R        | TACGGTAGCAGAGACTTGGTCTGAGATTTGATTGTAAGAAGACCA    |
| DICER1fE20c-CS2F        | TACGGTAGCAGAGACTTGGTCTCAGCTGAAAGTTTACAGCAGAT      | DICER1fE20c-CS1R        | ACACTGACGACATGGTTCTACAAAATTTCTGAATGGAATATGAGGTA  |
| DICER1fE20d-CS2F        | TACGGTAGCAGAGACTTGGTCTCAGGAAATACCCGTGCAAC         | DICER1fE20d-CS1R        | ACACTGACGACATGGTTCTACATGAGCACTTGAATAGTGTCTGTG    |
| DICER1fE20e-CS2F        | TACGGTAGCAGAGACTTGGTCTACTCAGTCAAGTGGAACTCTGT      | DICER1fE20e-CS1R        | ACACTGACGACATGGTTCTACAGTCCCAAGCATTTCAG           |
| DICER1fE20f-CS1F        | ACACTGACGACATGGTTCTACATCAAAACGCTAGTGTGATTT        | DICER1fE20f-CS2R        | TACGGTAGCAGAGACTTGGTCTcaatgaataaactgctcaaaaata   |
| DICER1fE21a-CS1F        | ACACTGACGACATGGTTCTACAttgataaaattgtttgaaattct     | DICER1fE21a-CS2R        | TACGGTAGCAGAGACTTGGTCTTTTCCCATTTATCTGTGTTGC      |
| DICER1fE21b-CS1F        | ACACTGACGACATGGTTCTACATCCTGGTTATGTGTAATAACAGACA   | DICER1fE21b-rd-CS2R     | TACGGTAGCAGAGACTTGGTATATCTACTTATTAACAATACACAA    |
| DICER1fE22a-CS2F        | TACGGTAGCAGAGACTTGGTCTCAGCTATGTTTCCCCTCTT         | DICER1fE22a-CS1R        | ACACTGACGACATGGTTCTACATCTGATCATACTCCAGGAAA       |
| DICER1fE22b-CS2F        | TACGGTAGCAGAGACTTGGTCTAGGAAAGAGGCTGACTATGAAGA     | DICER1fE22b-CS1R        | ACACTGACGACATGGTTCTACACAAAATCTGATGAAAATGCGATA    |
| DICER1fE22c-CS2F        | TACGGTAGCAGAGACTTGGTCTGAATGGAAGAAATGCCAAA         | DICER1fE22c-CS1R        | ACACTGACGACATGGTTCTACAGACTGCTTTCCCCTGTCA         |
| DICER1fE22d-CS2F        | TACGGTAGCAGAGACTTGGTCTGTTCTGGAATCCATCAGAGAAA      | DICER1fE22d-CS1R        | ACACTGACGACATGGTTCTACACTTACAGCCCAAGTGAACA        |
| DICER1fE22e-CS1F        | ACACTGACGACATGGTTCTACAAGGGCTGCTCAGCTTTTC          | DICER1fE22e-CS2R        | TACGGTAGCAGAGACTTGGTCTGAACTGGCCACAGAAGC          |
| DICER1fE22f-CS1F        | ACACTGACGACATGGTTCTACAGCAACAAAAGAACCTTTCA         | DICER1fE22f-CS2R        | TACGGTAGCAGAGACTTGGTCTCAAACCCGATATAAGGTGA        |
| DICER1fE22g-CS1F        | ACACTGACGACATGGTTCTACATTGATCATCCAGATGCAGA         | DICER1fE22g-CS2R        | TACGGTAGCAGAGACTTGGTCTCCCAGAAATGAAGTCTGGTC       |
| DICER1fE23a-CS1F        | ACACTGACGACATGGTTCTACAttecaactggatccct            | DICER1fE23a-CS2R        | TACGGTAGCAGAGACTTGGTCTGACTGTGTTGATGTTGATCTTACAGC |
| DICER1fE23b-CS1F        | ACACTGACGACATGGTTCTACACAACAACACCATCTTTGCAT        | DICER1fE23b-CS2R        | TACGGTAGCAGAGACTTGGTCTcaagactcctagttagacacttt    |
| DICER1fE24a-CS2F        | TACGGTAGCAGAGACTTGGTCTGCTTACAAGTCACTTTCCCTCT      | DICER1fE24a-rd-CS1R     | ACACTGACGACATGGTTCTACACTGAAGTGTGTTTTAATTTGTGG    |
| DICER1fE24b-CS1F        | ACACTGACGACATGGTTCTACAGGATAGTGGGATGTCAGTGG        | DICER1fE24b-CS2R        | TACGGTAGCAGAGACTTGGTCTGGGGTACATTTGCAGAAAAAC      |
| DICER1fE25-CS1F         | ACACTGACGACATGGTTCTACAcacaaaataaaacaactcagaga     | DICER1fE25-CS2R         | TACGGTAGCAGAGACTTGGTCTTgaactttccccttgatg         |
| DICER1fE26a-CS1F        | ACACTGACGACATGGTTCTACAttctgacttaactcaagctgttt     | DICER1fE26a-CS2R        | TACGGTAGCAGAGACTTGGTCTCTTCTGTCTGCTGAGATTT        |
| DICER1fE26b-CS1F        | ACACTGACGACATGGTTCTACAAGAACTTACAGCAGGAAAGGT       | DICER1fE26b-CS2R        | TACGGTAGCAGAGACTTGGTCTGTTTTGTTTTCTGTTTTGAATTT    |
| DICER1f-rs10144436-CS1F | ACACTGACGACATGGTTCTACATTCTCCATCTCTCCGGTGTG        | DICER1f-rs10144436-CS2R | TACGGTAGCAGAGACTTGGTCTCCCTTACTATCAGGTGCAACA      |
| DICER1f-rs1057035-CS1F  | ACACTGACGACATGGTTCTACACCCTTTAGAGCCCTGTGTG         | DICER1f-rs1057035-CS2R  | TACGGTAGCAGAGACTTGGTCTTTTCTGCAAGTGTCTTTTCA       |
| DICER1f-rs1187652-CS1F  | ACACTGACGACATGGTTCTACAGCTGAGCAGAGGTTGCTCAT        | DICER1f-rs1187652-CS2R  | TACGGTAGCAGAGACTTGGTCTGAAAGCAGAGCTGACAGTTTTC     |
| DICER1f-rs13078-CS2F    | TACGGTAGCAGAGACTTGGTCTCAGAGCCTCAAAGCTAAATCA       | DICER1f-rs13078-CS1R    | ACACTGACGACATGGTTCTACACTGCCTTCAATTCATTCCAC       |
| DICER1f-rs3742330-CS2F  | TACGGTAGCAGAGACTTGGTCTGAGTCCGCTTCTTCAATG          | DICER1f-rs3742330-CS1R  | ACACTGACGACATGGTTCTACATTTGGTGGCTTCAACTCTGT       |
| DICER1f-rs7158095-CS2F  | TACGGTAGCAGAGACTTGGTCTGTGGGAGAAAAATGCCTCA         | DICER1f-rs7158095-CS1R  | ACACTGACGACATGGTTCTACAAGTGAACCGGCTGAAGTTTG       |
| DICER1f-rs80103767-CS1F | ACACTGACGACATGGTTCTACATCCAACCAGTACTTCTTTCA        | DICER1f-rs80103767-CS2R | TACGGTAGCAGAGACTTGGTCTAAATACAATGGTCTCAATGCAA     |
