# Supplementary material
Source: PubMed Central journal article supplement (PMC4129448)
Supplement: NIHMS606226-supplement-supp_4.pdf [file NIHMS606226-supplement-supp_4.pdf]

**Supplementary Table S3:** Primer Sequences for loss of heterozygosity analysis

| <b>Locus of Interest</b> | <b>Forward:</b> | <b>Primer Sequence</b>   | <b>Reverse:</b> | <b>Primer Sequence</b>  | <b>Product Size</b> |
|--------------------------|-----------------|--------------------------|-----------------|-------------------------|---------------------|
| rs13078                  | rs130_F         | GGGGAAAATTATTTAAATCGGAAA | rs130_R         | CAAAGCAGAAGTGAGGAAAGAA  | 201bp               |
| rs10144436               | rs101_F         | CTTAGTGTTAGAAGGCCATGGAG  | rs101_R         | CGCACTTCTCCTCTCGAAAA    | 150bp               |
| rs7158095                | rs715_F         | GTGGGAGAAAAATGCCTCAA     | rs715_R         | AAACGGCTGAAGTTTGCTGT    | 161bp               |
| rs1057035                | rs105_F         | TGCAATGTGAGACCGAATGT     | rs105_R         | GGACTGCGGAAAGCATATTA    | 203bp               |
| rs3742330                | rs374_F         | CAGTCGGCTTCTTCAGTCG      | rs374_R         | GGTCTCAGTTTGGTGGCTTC    | 171bp               |
| rs80103767               | rs801_F         | CCAACCACTGATTACTTTTCAGG  | rs801_R         | GGAAAATACAATGGTCTCAATGC | 180bp               |
| D14S265                  | D14S265-F       | TGTTGCAAGAATAATAGGACAAAA | D14S265-R       | TATTTGCCAAGGGAAATGGA    | 156bp               |
| D14S1054                 | D14S1054-F      | TGTGCTAGCCTCCACAGTCA     | D14S1054-R      | TCAGAGGACCTGGGCATTTA    | 172bp               |
