# Supplementary material
Source: PubMed Central journal article supplement (PMC4129448)
Supplement: NIHMS606226-supplement-supp_5.pdf [file NIHMS606226-supplement-supp_5.pdf]

Supplementary Table S4: *DICER1* Mutations and Traces

| PitB CASE | Germ-line <i>DICER1</i> Mutation            |                                                                                     | Somatic <i>DICER1</i> Mutation - RNase IIIb domain |                                                                                       |
|-----------|---------------------------------------------|-------------------------------------------------------------------------------------|----------------------------------------------------|---------------------------------------------------------------------------------------|
| CASE 1    | Not Available                               | N/A                                                                                 | c.5437G>A<br>p.(Glu1813Lys) <sup>a</sup>           | 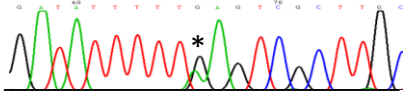   |
| CASE 2    | c.3277_3280delAACT<br>p.(Asn1093*)          |    | Negative                                           | Negative                                                                              |
| CASE 3    | c.2379T>G<br>p.(Tyr793*)<br>(NMD of Mutant) |    | Not Available                                      | N/A                                                                                   |
| CASE 4    | c.3535_3538delTCTT<br>p.(Ser1179Thrfs*12)   |    | c.5125G>T<br>p.(Asp1709Thr)                        |    |
| CASE 5    | c.1525C>T<br>p.(Arg509*)                    |    | c.5425G>T<br>p.(Gly1809Trp)                        |    |
| CASE 6    | c.4309_4312delGACT<br>p.(Asp1437Metfs*16)   |    | c.5125G>A<br>p.(Asp1709Asn)                        |    |
| CASE 7    | Not Available                               | N/A                                                                                 | Not Available                                      | N/A                                                                                   |
| CASE 8    | Not Completed, DNA<br>quality too poor      | Not Complete <sup>b</sup>                                                           | Not Completed, DNA<br>quality too poor             | Not Complete <sup>b</sup>                                                             |
| CASE 9    | c.2026C>T<br>p.(Arg676*)                    |   | c.5439G>T<br>p.(Glu1813Asp)                        |   |
| CASE 10   | c.2026C>T<br>p.(Arg676*)                    |  | c.5438A>T<br>p.(Glu1813Val)                        |  |
| CASE 11   | c.1284delGA<br>p.(Lys429Alafs*47)           |  | c.5437G>A<br>p.(Glu1813Lys)                        |  |
| CASE 12   | c.5125G>C<br>p.(Asp1709His)                 |  | LOH                                                |  |
| CASE 13   | Negative                                    | Negative                                                                            | LOH                                                | LOH (STR marker genotyping: Supplementary<br>Figure S7)                               |

Mutation indicated by an asterisk. **Abbreviations:** LOH, loss of heterozygosity; NMD, nonsense-mediated decay; STR, short tandem repeat.

<sup>a</sup> Mutation not confirmed to be somatic in origin; <sup>b</sup> Molecular genetic testing of sample is incomplete due to difficulty amplifying DNA.
